# Supplementary material
Source: Springer Nature journal article supplement (https://www.springermedizin.de/resource/supplementary/12943_2012_1116_MOESM4_ESM.pdf/9552528)

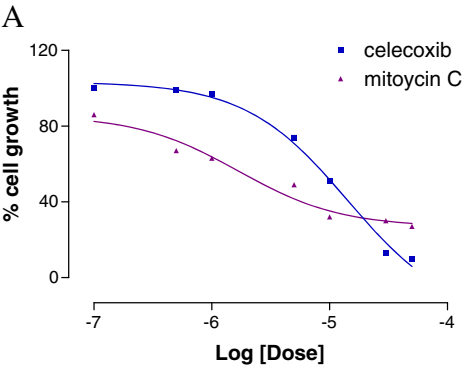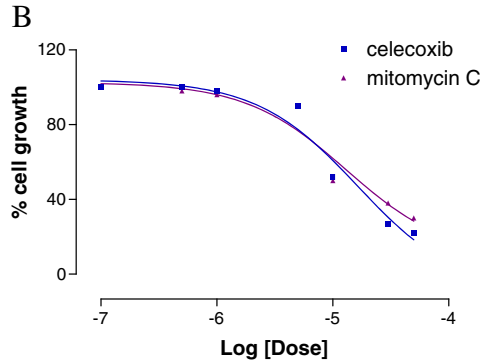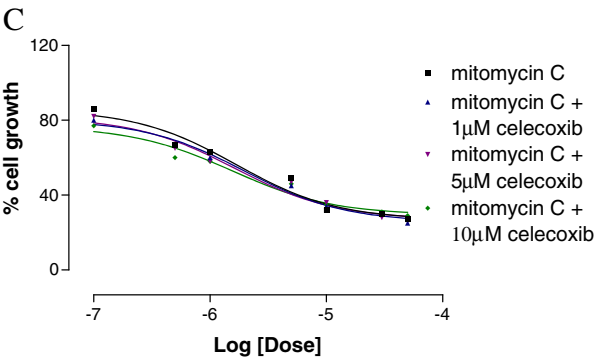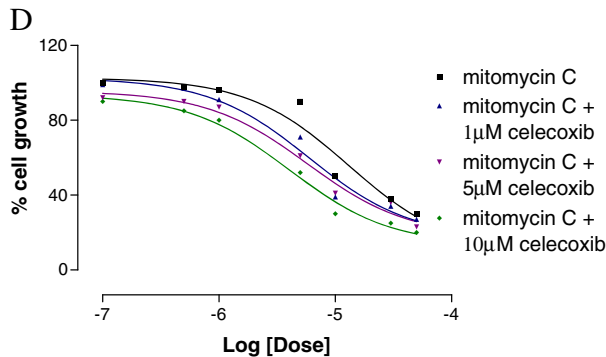

Supplement: MOESM4 [file 9552528]
